# Supplementary material for: Diabetes in a TB and HIV-endemic South African population: Analysis of a virtual cohort using routine health data
Source: PubMed Central journal article supplement (PMC8104376; doi:10.1371/journal.pone.0251303), 2021-05-07
Supplement: pone.0251303.s001.pdf [file pone.0251303.s001.pdf]

1 **Supplementary data:**

2 Diabetes in a TB and HIV-endemic South African population: Analysis of a virtual cohort  
 3 using routine health data.

4 **S1 Table:** Characteristics of the study population who are HIV positive and stratified by the  
 5 ascertainment of the HIV in relation to diabetes ascertainment

|                                          | <b>All</b><br><i>N=2423<sup>a</sup></i> | <b>HIV before diabetes</b><br><b>ascertainment</b><br><i>N=1525 (63%)</i> | <b>HIV after diabetes</b><br><b>ascertainment</b><br><i>N=898 (37%)</i> | p-<br>value |
|------------------------------------------|-----------------------------------------|---------------------------------------------------------------------------|-------------------------------------------------------------------------|-------------|
| Sex (Female)                             | 1676 (69.2%)                            | 1033 (67.8%)                                                              | 643 (71.6%)                                                             | 0.058       |
| Age at diabetes<br>ascertainment (Years) | 46.0<br>[39.0;52.0]                     | 45.0 [39.0;52.0]                                                          | 47.0 [39.0;53.0]                                                        | 0.029       |
| Baseline HbA1c (%)                       | 8.4 [6.9;10.9]                          | 8.0 [6.8;10.4]                                                            | 9.4 [7.3;11.8]                                                          | <0.001      |
| Last HbA1c (%)                           | 12.2 [8.0;15.0]                         | 12.5 [7.9;15.2]                                                           | 11.6 [8.0;14.5]                                                         | 0.005       |
| Patient outcome<br>(Deceased)            | 142 (5.9%)                              | 69 (4.5%)                                                                 | 73 (8.1%)                                                               | <0.001      |
| Diabetes duration<br>(Years)             | 4.0 [1.2;6.5]                           | 2.9 [0.6;5.6]                                                             | 5.8 [3.1;7.8]                                                           | <0.001      |
| Ever started diabetes<br>treatment       | 2056 (84.9%)                            | 1237 (81.1%)                                                              | 819 (91.2%)                                                             | <0.001      |
| Ever had Tuberculosis                    | 786 (32.4%)                             | 548 (35.9%)                                                               | 238 (26.5%)                                                             | <0.001      |
| TB-Diabetes<br>comorbidity               | 372 (47.8%)                             | 164 (30.1%)                                                               | 208 (88.5%)                                                             | <0.001      |

6 a. 85 (3%) individuals did not have enough data to classify when they were ascertained HIV relative to  
 7 diabetes ascertainment

8  
 9  
 10  
 11  
 12  
 13  
 14  
 15  
 16  
 17

18 **S2 Table:** Characteristics of the whole study population, and stratified by history of active  
 19 Tuberculosis disease

|                                          | <b>ALL</b><br>N=13771 | <b>Never had<br/>Tuberculosis</b><br>N=11932 | <b>Ever had<br/>Tuberculosis</b><br>N=1839 | <b>p-<br/>value</b> |
|------------------------------------------|-----------------------|----------------------------------------------|--------------------------------------------|---------------------|
| Sex (Female)                             | 9246 (67.2%)          | 8201 (68.8%)                                 | 1045 (56.9%)                               | <0.001              |
| Age at diabetes<br>ascertainment (Years) | 52.0 [44.0;59.0]      | 52.0 [44.0;60.0]                             | 49.0 [41.0;56.0]                           | <0.001              |
| Baseline HbA1c (%)                       | 8.5 [7.0;11.1]        | 8.5 [7.0;11.0]                               | 9.2 [7.1;11.8]                             | <0.001              |
| Last HbA1c (%)                           | 9.5 [7.2;12.7]        | 9.3 [7.1;12.5]                               | 10.9 [7.6;14.1]                            | <0.001              |
| Patient outcome (Deceased)               | 631 (4.6%)            | 448 (3.8%)                                   | 183 (10.0%)                                | <0.001              |
| TB-Diabetes comorbidity                  | 1008 (55.9%)          | 0 (.%)                                       | 1008 (55.9%)                               | .                   |
| Ever started TB treatment                | 1831 (13.3%)          | 0 (0.0%)                                     | 1831 (99.6%)                               | 0.000               |
| Ever started diabetes<br>treatment       | 11745 (85.3%)         | 10141 (85.0%)                                | 1604 (87.2%)                               | 0.013               |
| Linkage to diabetes<br>Treatment         | 10707 (91.2%)         | 9335 (92.1%)                                 | 1372 (85.5%)                               | <0.001              |
| Linkage to HbA1c testing                 | 9264 (67.3%)          | 8029 (67.3%)                                 | 1235 (67.2%)                               | 0.896               |

20  
 21  
 22  
 23  
 24  
 25  
 26  
 27  
 28  
 29  
 30  
 31  
 32  
 33  
 34  
 35  
 36

37 **S3 Table:** Number of study participants recorded as being on the different combinations of  
38 Diabetes, TB, and HIV medications.

| Diabetes treatment | Tuberculosis treatment | HIV treatment | Number of study participants |
|--------------------|------------------------|---------------|------------------------------|
| 1                  | 0                      | 0             | 10374                        |
| 1                  | 0                      | 1             | 1323                         |
| 1                  | 1                      | 0             | 1088                         |
| 1                  | 1                      | 1             | 743                          |

39

40

41

42

43

44

45

46

47

48

49

50

51

52

53

54

55

56

57

58

59

60

61

62 **S4 Table:** Characteristics of the whole study population, and stratified by the sex of the  
 63 participants

|                                       | <b>[ALL]</b><br>N=13754 <sup>a</sup> | <b>Female</b><br>N=9246 (67%) | <b>Male</b><br>N=4508 (33%) | <b>p-value</b> |
|---------------------------------------|--------------------------------------|-------------------------------|-----------------------------|----------------|
| Age at diabetes ascertainment (Years) | 52.0 [44.0;59.0]                     | 52.0 [44.0;60.0]              | 51.0 [43.0;59.0]            | <0.001         |
| Age categories                        |                                      |                               |                             | <0.001         |
| 18-39                                 | 2108 (15.3%)                         | 1348 (14.6%)                  | 760 (16.9%)                 |                |
| 40-49                                 | 3711 (27.0%)                         | 2476 (26.8%)                  | 1235 (27.4%)                |                |
| 50-59                                 | 4570 (33.2%)                         | 3090 (33.4%)                  | 1480 (32.8%)                |                |
| 60-69                                 | 2356 (17.1%)                         | 1597 (17.3%)                  | 759 (16.8%)                 |                |
| 70-79                                 | 804 (5.8%)                           | 569 (6.2%)                    | 235 (5.2%)                  |                |
| >=80                                  | 205 (1.5%)                           | 166 (1.8%)                    | 39 (0.9%)                   |                |
| HIV Positive                          | 2506 (18.2%)                         | 1726 (18.7%)                  | 780 (17.3%)                 | 0.054          |
| Ever had Tuberculosis                 | 1838 (13.4%)                         | 1045 (11.3%)                  | 793 (17.6%)                 | <0.001         |
| Tuberculosis-Diabetes comorbidity     | 1007 (55.9%)                         | 581 (56.8%)                   | 426 (54.8%)                 | 0.415          |
| Baseline HbA1c (%)                    | 8.5 [7.0;11.1]                       | 8.6 [7.0;11.1]                | 8.5 [6.9;11.2]              | 0.441          |
| Baseline HbA1c < 7%                   | 2816 (24.5%)                         | 1867 (24.0%)                  | 949 (25.5%)                 | 0.089          |
| Last HbA1c (%)                        | 9.4 [7.2;12.7]                       | 9.5 [7.2;12.7]                | 9.3 [7.1;12.7]              | 0.038          |
| Last HbA1c < 7%                       | 2927 (21.3%)                         | 1886 (20.4%)                  | 1041 (23.1%)                | <0.001         |
| Patient outcome (Deceased)            | 631 (4.6%)                           | 394 (4.3%)                    | 237 (5.3%)                  | 0.010          |
| Ever started TB treatment             | 1830 (13.3%)                         | 1043 (11.3%)                  | 787 (17.5%)                 | <0.001         |
| Ever started diabetes treatment       | 11729 (85.3%)                        | 7802 (84.4%)                  | 3927 (87.1%)                | <0.001         |
| Linkage to diabetes treatment         | 10694 (91.2%)                        | 7117 (91.2%)                  | 3577 (91.1%)                | 0.838          |
| Linkage to HbA1c testing              | 9250 (67.3%)                         | 6157 (66.6%)                  | 3093 (68.6%)                | 0.021          |

64

65

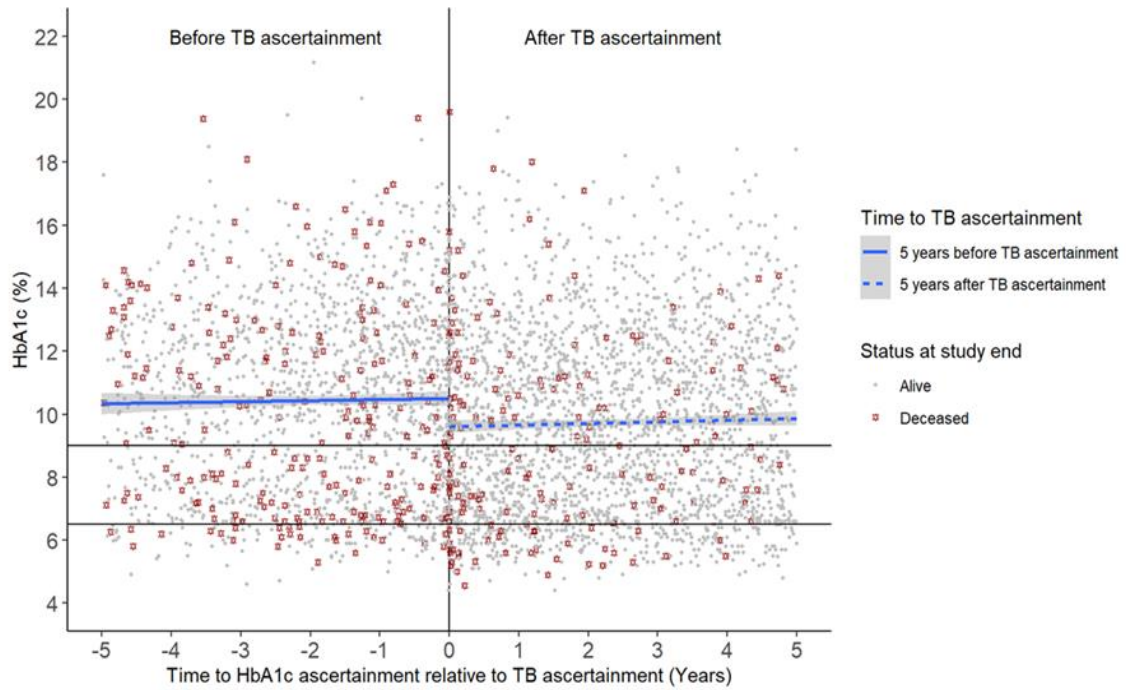

66  
 67 **S1 Fig:** Effect of Tuberculosis ascertainment on HbA1c (%) over a 5-year period. HbA1c  
 68 plotted by participant outcome at the end of the study i.e. alive (grey circle) or deceased  
 69 (dark-red star).

70  
 71  
 72  
 73  
 74  
 75  
 76  
 77

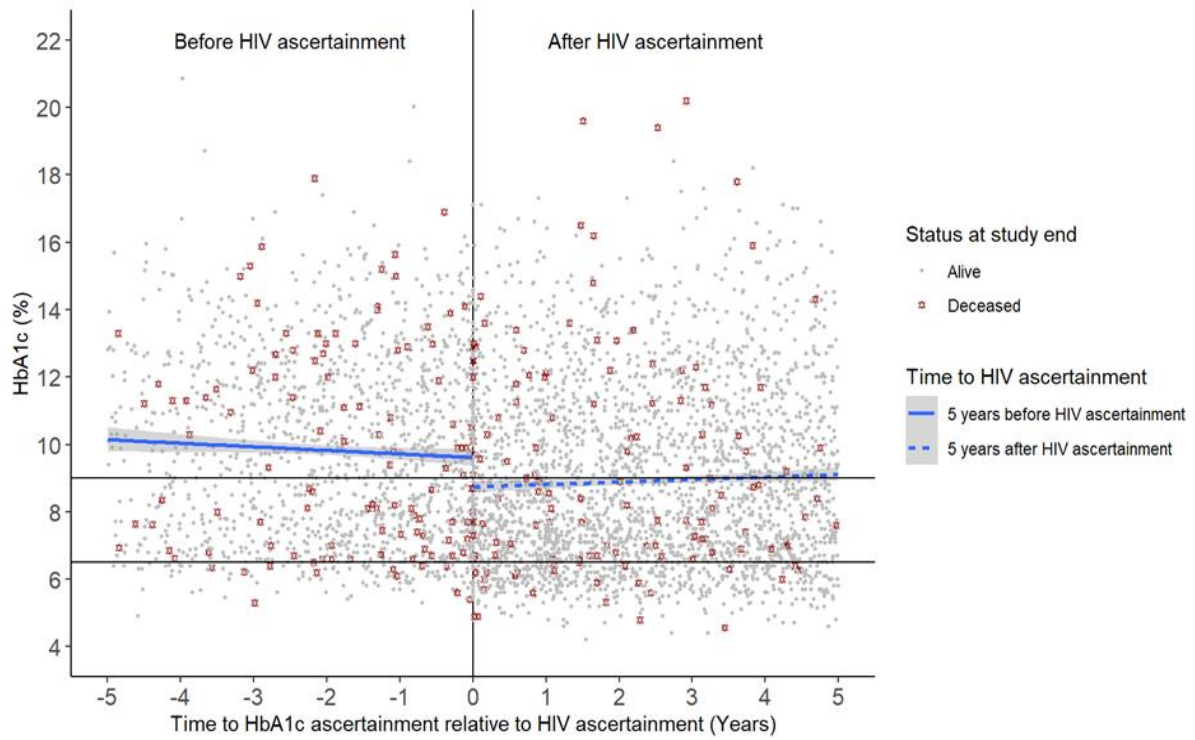

78

79 **S2 Fig:** Effect of HIV ascertainment on HbA1c (%) over a 5-year period. HbA1c plotted by  
 80 participant outcome at the end of the study i.e. alive (grey circle) or deceased (dark-red star).
